# Supplementary material
Source: PubMed Central journal article supplement (PMC5582684)

## **Dental Decay Phenotype in Nonsyndromic Orofacial Clefting**

B.J. Howe, M.E. Cooper, G.L. Wehby, J.M. Resick, N.L. Nidey, L.C. Valencia-Ramirez, A.M. Lopez-Palacio, D. Rivera, A.R. Vieira, S.M. Weinberg, M.L. Marazita, and L.M. Moreno Uribe

### **Appendix**

#### **Methods**

##### **Sample**

Exclusion criteria for controls included a positive family history for orofacial clefts or syndromes and a history of facial trauma or surgery. Exclusion criteria for unaffected family members was overt orofacial clefting. Also, all edentulous subjects were excluded from the study. In the unaffected sibling and control groups only one blood related person per family was included in each dentition group, excluding spouses, thus attempting to remove genetic bias from the dentition group comparisons.

##### **Dental Exam and intraoral photos**

In-person dental exams for the whole mouth were performed on subjects by oral cavity inspection utilizing dental mirrors and explorers. Sites were provided with cameras (Cannon EF 100mm f/2.8 macro USM lens, Cannon macro MR-14EX ring flash) and supplies for intraoral photo collection. Prior to photographs, all removable appliances/prostheses were removed.

##### **Calibration**

Calibration and training for intraoral dental exams and photos was performed at the University of Pittsburgh for all sites prior to the start of data collection. The photo rater, BJH, was calibrated against two experienced dentists and co-authors, LMU and ARV. Data from fifteen subjects randomly chosen were used for calibration. Each subject was rated two times by each rater (BJH, LMU, and ARV). Intrarater reliability for BJH, kappa = 0.95. Inter-rater reliability between all 3 raters kappa = 0.91-0.93. Testing was completed to determine the reliability between the in-person dental exam form and the intraoral photo form on 158 subjects who had both forms, tests showing both forms with almost perfect agreement (kappa >90%).

## **Statistical Methods**

For each dentition, various case-control comparison models were run adjusting for gender and age as a continuous or categorical variable. Within the primary and mixed dentition groups, all individuals spanned approximately a five year age interval. Preliminary regression analysis showed that there were no age or gender effects on the DFT(dft) or DT(dt) percentages in the primary or mixed dentition groups, except for dft in the primary dentition of the case vs. control proband comparison. As indicated above, different age and gender adjustment models were attempted and no significant case-control differences were obtained regardless of the adjustments performed. Therefore analyses were completed via non-parametric t-tests (Wilcoxon Rank Sum test) with no adjustment for dental age and gender for the primary and mixed dentition. For the permanent dentition, age was found to have significant confounding effects. Therefore the dental age continuum was categorized into nine distinct age groups (Appendix table 1). Regression analyses (general linear modeling) of case-control status, allowing for adjustment of age and gender, were completed by considering the DFT and dft percentages in each area of the mouth.

## **Discussion**

### **Decay Detection**

The use of filled teeth (FT/ft) is a study limitation. Although restorations can be done for various reasons on teeth that don't have dental decay (cracks, chips, trauma, etc) for this study it was assumed that all restorations were completed due to decay which indeed could have overestimated dental decay since patients were examined once by a dental professional who had no other dental records for reference. However %DFT/dft overestimation would apply to both cases and controls and therefore is unlikely to have biased our results. We did not see overestimation in our %DFT/dft compared to other studies likely because the same assumption is broadly made across dental decay studies. In regards to including missing teeth in the %DFT/dft, as mentioned in the methods, they were not included in the current analyses due to limited and in many cases potentially erroneous self-reported data on the reason for missing teeth. Self-reporting was generalized to an area of the mouth (by quadrant) and with multiple potential missing teeth in a given quadrant, we could not assume that all these teeth are missing

due to decay only. This does pose a limitation with the current study. In the analysis, dental decay measurement was also limited to the first molar to first molar in the maxillary and mandibular arches due to the inability to predictably see the second molars in intraoral photographs. The in-person dental exam data was then also limited to first molar to be consistent with the intraoral photographic data. This limitation may have led to a possible decrease in the number of decayed and filled teeth included in the DFT count. However, decay rates in controls between our study and prior studies were similar, lending support to our decay detection methods.

Even though the percent dft and DFT in the current study were lower than most previous studies it is of interest that our results for overall differences in dft and DFT occurrence between case probands and controls are similar with most previous studies for the primary (Chapple and Nunn 2001; Britton and Welbury 2010; Kirchberg et al. 2012; King et al. 2013; Moura et al. 2013) and permanent (Chapple and Nunn 2001; Hewson et al. 2001; Ahluwalia et al. 2004; Kirchberg et al. 2004; Lages et al. 2004; Parapanisiou et al. 2009; Zhu et al. 2010) dentitions, supporting the generalizability of our decay estimation methods (Appendix Tables 3-5). Moreover, we found no significant difference in dental decay between unaffected siblings in the primary, mixed, and permanent dentitions and unaffected parents in the permanent dentition compared with controls. Unlike case probands whose decay may be highly related to surgical complications and/or the physical cleft itself as indicated above, differences between unaffected relatives and controls may be suggestive of a higher genetic predisposition to dental decay. However our results did not support an increased genetic predisposition for decay risk in unaffected relatives beyond that of the general population.

### **Cleft Type**

One possible limitation is that the proportion of cases with CPO in the sample is nearly half of the expected 30%. This is partly because the sites in Colombia and Texas only recruited cases with CLO and CLP as they had recruitment protocols underway before they joined the larger study that only included these phenotypes. This especially reduced the proportion of CPO in the Latin American group. CPO is also generally less prevalent among Hispanics than non-Hispanic Whites (Burg et al. 2016). Since there were no prominent differences in outcome comparisons by cleft type in the overall sample, it is unlikely that the underrepresentation of cases with CPO

would have substantially biased the results pooling by cleft type including when stratifying by ancestry. Further research with larger sample sizes are needed to adequately examine potential heterogeneity in dental phenotypes by cleft type. Notably also, no significant differences in dental decay were found between the cleft area (canine to canine) and the rest of the maxillary dentition.

### **Age and SES**

It is also generally known that age is a confounding factor for increased dental decay risk. We found that age was a confounder for the case-control comparisons of permanent dentition both in the pooled sample and in the two groups defined by self-reported ethnicity. We account for this confounding by adjusting for age in the regression models for these comparisons. However, case-control differences in permanent dentition decay may become more prominent with age (i.e. effect heterogeneity) due to differences in type and intensity of decay risk factors over time. Identifying such heterogeneity requires large samples with longitudinal data that allow comparisons at different ages between cases and controls matched by age. Examining such heterogeneity in future studies with sufficient samples by age is an important research area.

Another possible limitation of the study is that case probands and controls may differ based on socioeconomic status (SES) and access to dental care. However, control subjects were recruited from the same communities as case probands with no restrictions on SES or access to dental care thus reducing, but not eliminating, the chance of these confounders.

### **Ancestry**

Unmeasured differences in race/ethnicity between cases and controls may have been further increased by some sites (Colorado and Texas) recruiting only cases and not controls, which may have further imbalanced race/ethnicity between cases and controls. This may confound our results, although it is unclear *a priori* whether this would bias the results towards the null indicating no differences between cases and controls (which is the main pattern that we find) or in the direction of spurious differences, in which case such differences do not seem to be impacting our results. In addition to possibly introducing confounding in the pooled analysis and the analyses of the two broad subgroups, another limitation of such heterogeneity is that we are

unable to fully examine if and how case-control group differences in these dental outcomes vary by ancestry (i.e. effect heterogeneity) and whether the pattern of no or small and insignificant differences is also observed across narrowly defined racial/ethnic groups. Such an evaluation would require large samples for each ancestral group and matching cases and controls by race/ethnicity. However, when we stratified our sample into the two broad groups mentioned above (Caucasian versus non-Caucasian Latin American), there were no significant differences between cases and controls within each group (see tables 2-4). Therefore, while confounding and effect heterogeneity by ancestral background are still potential limitations, these analyses suggests that they do not substantially impact our main inference.

---

## **References**

- Ahluwalia M, Brailsford SR, Tarelli E, Gilbert SC, Clark DT, Barnard K, Beighton D. 2004. Dental caries, oral hygiene, and oral clearance in children with craniofacial disorders. *J Dent Res.* 83(2):175-179.
- Britton KF, Welbury RR. 2010. Dental caries prevalence in children with cleft lip/palate aged between 6 months and 6 years in the west of scotland. *Eur Arch Paediatr Dent.* 11(5):236-241.
- Burg ML, Chai Y, Yao CA, Magee W, 3rd, Figueiredo JC. 2016. Epidemiology, etiology, and treatment of isolated cleft palate. *Frontiers in physiology.* 7:67.
- Chapple JR, Nunn JH. 2001. The oral health of children with clefts of the lip, palate, or both. *Cleft Palate Craniofac J.* 38(5):525.
- Hewson AR, McNamara CM, Foley TF, Sandy JR. 2001. Dental experience of cleft affected children in the west of ireland. *Int Dent J.* 51(2):73.
- King NM, Wong WL, Wong HM. 2013. Caries experience of chinese children with cleft lip and palate. *Cleft Palate Craniofac J.* 50(4):448.
- Kirchberg A, Makuch A, Hemprich A, Hirsch C. 2012. Dental caries in the primary dentition of german children with cleft lip and palate. *Cleft Palate Craniofac J.*
- Kirchberg A, Treide A, Hemprich A. 2004. Investigation of caries prevalence in children with cleft lip, alveolus, and palate. *J Craniomaxillofac Surg.* 32(4):216.
- Lages EM, Marcos B, Pordeus IA. 2004. Oral health of individuals with cleft lip, cleft palate, or both. *Cleft Palate Craniofac J.* 41(1):59.
- Moura AM, Andre M, Lopez MT, Dias RB. 2013. Prevalence of caries in brazilian children with cleft lip and/or palate, aged 6 to 36 months. *Braz Oral Res.* 27(4):336.
- Parapanisiou V, Gizani S, Makou M, Papagiannoulis L. 2009. Oral health status and behaviour of greek patients with cleft lip and palate. *Eur Arch Paediatr Dent.* 10(2):85.
- Zhu WC, Xiao J, Liu Y, Wu J, Li JY. 2010. Caries experience in individuals with cleft lip and/or palate in china. *Cleft Palate Craniofac J.* 47(1):43.

**Appendix Table 1. Dental Age Categories for the Permanent Dentition.**

| <b>Age Group in years</b> | <b>N* (PB, SIB, PAR, CTRL)</b> |
|---------------------------|--------------------------------|
| <15                       | 75, 75, 0, 66                  |
| 15-19                     | 75, 70, 16, 85                 |
| 20-24                     | 28, 39, 169, 114               |
| 25-29                     | 21, 16, 234, 142               |
| 30-34                     | 6, 5, 216, 149                 |
| 35-39                     | 3, 4, 255, 131                 |
| 40-49                     | 4, 0, 297, 124                 |
| 50-59                     | 2, 0, 81, 47                   |
| ≥60                       | 1, 0, 17, 10                   |

\* Within the permanent dentition group

**Appendix Table 2. Descriptive Analysis of Case Probands, Unaffected Family Members and Controls.**

|                                | Relation Group |                               |                               |            |              |
|--------------------------------|----------------|-------------------------------|-------------------------------|------------|--------------|
|                                | Cleft Proband  | Non-Cleft Sibling of Probands | Non-Cleft Parents of Probands | Controls   | Total        |
| <b>ALL</b>                     | 639            | 464                           | 1085                          | 1138       | 3326         |
| Gender (M,F)                   | 384,255        | 219,245                       | 444,641                       | 493,645    | 1540,1786    |
| Dentition (Prime,Mx,Permanent) | 169,255,215    | 88,167,209                    | 0,0,1085                      | 81,189,868 | 338,611,2377 |
| Gender X Dentition             |                |                               |                               |            |              |
| Male prime only                | 97             | 53                            | 0                             | 41         | 191          |
| Female prime only              | 72             | 35                            | 0                             | 40         | 147          |
| Male mixed                     | 157            | 83                            | 0                             | 105        | 345          |
| Female mixed                   | 98             | 84                            | 0                             | 84         | 266          |
| Male perm only                 | 130            | 83                            | 444                           | 347        | 1004         |
| Female perm only               | 85             | 126                           | 641                           | 521        | 345          |
|                                |                |                               |                               |            |              |
| <b>Caucasian</b>               | 383            | 317                           | 636                           | 636        | 1972         |
| Gender (M,F)                   | 234,149        | 153,164                       | 259,377                       | 285,351    | 931,1041     |
| Dentition (Prime,Mx,Permanent) | 109,176,98     | 66,127,124                    | 0,0,636                       | 42,95,499  | 217,398,1357 |
| Gender X Dentition             |                |                               |                               |            |              |
| Male prime only                | 66             | 40                            | 0                             | 24         | 130          |
| Female prime only              | 43             | 26                            | 0                             | 18         | 87           |
| Male mixed                     | 110            | 51                            | 0                             | 54         | 225          |
| Female mixed                   | 66             | 66                            | 0                             | 41         | 173          |
| Male perm only                 | 58             | 62                            | 259                           | 207        | 576          |
| Female perm only               | 40             | 72                            | 377                           | 292        | 781          |
|                                |                |                               |                               |            |              |
| <b>Latin American</b>          | 256            | 147                           | 449                           | 502        | 1354         |
| Gender (M,F)                   | 150,106        | 66,81                         | 185,264                       | 208,294    | 609,745      |
| Dentition (Prime,Mx,Permanent) | 60,79,117      | 22,40,85                      | 0,0,449                       | 39,94,369  | 121,213,1020 |
| Gender X Dentition             |                |                               |                               |            |              |
| Male prime only                | 31             | 13                            | 0                             | 17         | 61           |
| Female prime only              | 29             | 9                             | 0                             | 22         | 60           |
| Male mixed                     | 47             | 22                            | 0                             | 51         | 120          |
| Female mixed                   | 32             | 18                            | 0                             | 43         | 93           |
| Male perm only                 | 72             | 31                            | 185                           | 140        | 428          |
| Female perm only               | 45             | 54                            | 264                           | 229        | 592          |



**Appendix Table 3: Decayed and Filled Teeth in the Primary Dentition**

| Primary Only          | Area of Mouth          | Proband (N = 169)       |      |      | Sibling (N = 88)       |      |      | Control (N = 81)      |      |      |
|-----------------------|------------------------|-------------------------|------|------|------------------------|------|------|-----------------------|------|------|
|                       |                        | dft                     | dt   | ft   | dft                    | dt   | ft   | dft                   | dt   | ft   |
| <b>ALL</b>            |                        |                         |      |      |                        |      |      |                       |      |      |
|                       | Whole                  | 1.21                    | 0.82 | 0.39 | 1.06                   | 0.55 | 0.52 | 1.26                  | 1.22 | 0.04 |
|                       | Maxilla                | 0.86                    | 0.62 | 0.24 | 0.73                   | 0.47 | 0.26 | 0.97                  | 0.94 | 0.04 |
|                       | Mandible               | 0.36                    | 0.21 | 0.15 | 0.34                   | 0.08 | 0.26 | 0.28                  | 0.28 | 0    |
|                       | Maxilla Canine- Canine | 0.47                    | 0.39 | 0.08 | 0.42                   | 0.34 | 0.08 | 0.48                  | 0.46 | 0.02 |
|                       |                        |                         |      |      |                        |      |      |                       |      |      |
| <b>Caucasian</b>      |                        | <b>Proband (N=109 )</b> |      |      | <b>Sibling (N=66 )</b> |      |      | <b>Control (N=42)</b> |      |      |
|                       | Whole                  | 1.06                    | 0.65 | 0.40 | 0.65                   | 0.26 | 0.39 | 0.86                  | 0.83 | 0.02 |
|                       | Maxilla                | 0.68                    | 0.46 | 0.23 | 0.39                   | 0.21 | 0.18 | 0.60                  | 0.57 | 0.02 |
|                       | Mandible               | 0.37                    | 0.19 | 0.17 | 0.26                   | 0.05 | 0.21 | 0.26                  | 0.26 | 0    |
|                       | Maxilla Canine- Canine | 0.33                    | 0.25 | 0.08 | 0.20                   | 0.12 | 0.08 | 0.33                  | 0.31 | 0.02 |
|                       |                        |                         |      |      |                        |      |      |                       |      |      |
| <b>Latin American</b> |                        | <b>Proband (N=60 )</b>  |      |      | <b>Sibling (N=22 )</b> |      |      | <b>Control (N=39)</b> |      |      |
|                       | Whole                  | 1.50                    | 1.13 | 0.37 | 2.32                   | 1.41 | 0.91 | 1.69                  | 1.64 | 0.05 |
|                       | Maxilla                | 1.17                    | 0.90 | 0.27 | 1.73                   | 1.23 | 0.50 | 1.38                  | 1.33 | 0.05 |
|                       | Mandible               | 0.33                    | 0.23 | 0.10 | 0.59                   | 0.18 | 0.41 | 0.31                  | 0.31 | 0    |
|                       | Maxilla Canine- Canine | 0.72                    | 0.65 | 0.07 | 1.09                   | 1.00 | 0.09 | 0.64                  | 0.61 | 0.03 |
|                       |                        |                         |      |      |                        |      |      |                       |      |      |

\*All numbers given as means

**Appendix Table 4: Decayed and Filled Teeth in the Mixed Dentition – Primary and Permanent.**

| MX Only                     |                        | Proband (N = 255) |       |       | Sibling (N = 167) |       |       | Control (N = 189) |       |       |
|-----------------------------|------------------------|-------------------|-------|-------|-------------------|-------|-------|-------------------|-------|-------|
|                             | Area of Mouth          | DFT/dft           | DT/dt | FT/ft | DFT/dft           | DT/dt | FT/ft | DFT/dft           | DT/dt | FT/ft |
| ALL<br>Primary              | Whole                  | 1.88              | 0.93  | 0.95  | 1.41              | 0.53  | 0.87  | 1.76              | 1.28  | 0.48  |
|                             | Maxilla                | 1.25              | 0.69  | 0.55  | 0.75              | 0.34  | 0.41  | 1.15              | 0.88  | 0.27  |
|                             | Mandible               | 0.64              | 0.24  | 0.40  | 0.66              | 0.19  | 0.47  | 0.60              | 0.39  | 0.21  |
|                             | Maxilla Canine- Canine | 0.37              | 0.26  | 0.11  | 0.09              | 0.06  | 0.03  | 0.26              | 0.25  | 0.01  |
| ALL<br>Permanent            | Whole                  | 0.16              | 0.07  | 0.09  | 0.21              | 0.07  | 0.14  | 0.17              | 0.05  | 0.13  |
|                             | Maxilla                | 0.12              | 0.05  | 0.07  | 0.11              | 0.04  | 0.07  | 0.14              | 0.04  | 0.10  |
|                             | Mandible               | 0.04              | 0.03  | 0.01  | 0.10              | 0.03  | 0.07  | 0.04              | 0.01  | 0.03  |
|                             | Maxilla Canine- Canine | 0.04              | 0.02  | 0.02  | 0.02              | 0.01  | 0.01  | 0.03              | 0.01  | 0.03  |
|                             |                        |                   |       |       |                   |       |       |                   |       |       |
| Caucasian<br>Primary        |                        | Proband (N =176)  |       |       | Sibling (N =127 ) |       |       | Control (N = 95)  |       |       |
|                             | Whole                  | 1.90              | 0.81  | 1.09  | 1.42              | 0.44  | 0.98  | 1.88              | 1.52  | 0.36  |
|                             | Maxilla                | 1.14              | 0.53  | 0.61  | 0.72              | 0.27  | 0.46  | 1.03              | 0.87  | 0.16  |
|                             | Mandible               | 0.76              | 0.28  | 0.48  | 0.69              | 0.17  | 0.52  | 0.84              | 0.64  | 0.02  |
| Caucasian<br>Permanent      | Maxilla Canine- Canine | 0.35              | 0.19  | 0.15  | 0.06              | 0.02  | 0.04  | 0.22              | 0.22  | 0     |
|                             | Whole                  | 0.12              | 0.06  | 0.06  | 0.20              | 0.06  | 0.14  | 0.12              | 0.03  | 0.09  |
|                             | Maxilla                | 0.06              | 0.04  | 0.05  | 0.09              | 0.02  | 0.07  | 0.09              | 0.03  | 0.06  |
|                             | Mandible               | 0.04              | 0.02  | 0.02  | 0.11              | 0.04  | 0.07  | 0.03              | 0     | 0.03  |
| Latin American<br>Primary   | Maxilla Canine- Canine | 0.03              | 0.02  | 0.01  | 0.01              | 0     | 0.01  | 0.01              | 0     | 0.01  |
|                             |                        | Proband (N = 79)  |       |       | Sibling (N =40)   |       |       | Control (N = 94)  |       |       |
|                             | Whole                  | 1.84              | 1.20  | 0.63  | 1.38              | 0.83  | 0.55  | 1.6               | 1.03  | 0.61  |
|                             | Maxilla                | 1.48              | 1.06  | 0.42  | 0.83              | 0.58  | 0.24  | 1.28              | 0.89  | 0.38  |
| Latin American<br>Permanent | Mandible               | 0.35              | 0.14  | 0.22  | 0.55              | 0.25  | 0.30  | 0.36              | 0.14  | 0.22  |
|                             | Maxilla Canine- Canine | 0.43              | 0.41  | 0.03  | 0.18              | 0.18  | 0     | 0.30              | 0.29  | 0.01  |
|                             | Whole                  | 0.27              | 0.11  | 0.15  | 0.25              | 0.13  | 0.13  | 0.22              | 0.06  | 0.16  |
|                             | Maxilla                | 0.20              | 0.06  | 0.14  | 0.18              | 0.13  | 0.05  | 0.18              | 0.04  | 0.14  |
| Latin American<br>Permanent | Mandible               | 0.06              | 0.05  | 0.01  | 0.08              | 0     | 0.08  | 0.04              | 0.02  | 0.02  |
|                             | Maxilla Canine- Canine | 0.04              | 0     | 0.04  | 0.08              | 0.05  | 0.03  | 0.05              | 0.01  | 0.04  |
|                             |                        |                   |       |       |                   |       |       |                   |       |       |

\*All numbers given as means

Appendix Table 5: Decayed and Filled teeth in the Permanent Dentition

| Permanent Only | Area of Mouth         | Proband (N = 215) |      |      | Sibling (N = 209) |      |      | Parent (N = 1085) |      |      | Control (N = 868) |             |             |
|----------------|-----------------------|-------------------|------|------|-------------------|------|------|-------------------|------|------|-------------------|-------------|-------------|
|                |                       | DFT               | DT   | FT   | DFT               | DT   | FT   | DFT               | DT   | FT   | DFT               | DT          | FT          |
| ALL            | Whole                 | 2.00              | 0.56 | 1.40 | 1.53              | 0.42 | 1.11 | 4.01              | 0.77 | 3.34 | 2.81              | 0.55        | 2.26        |
|                | Maxilla               | 1.23              | 0.39 | 0.84 | 0.90              | 0.30 | 0.60 | 2.84              | 0.54 | 1.30 | 2.03              | 0.41        | 1.62        |
|                | Mandible              | 0.73              | 0.17 | 0.56 | 0.64              | 0.12 | 0.52 | 1.25              | 0.21 | 1.04 | 0.77              | 0.13        | 0.64        |
|                | Maxilla Canine-Canine | 0.35              | 0.18 | 0.17 | 0.21              | 0.10 | 0.11 | 0.99              | 0.25 | 0.74 | 0.69              | 0.19        | 0.50        |
|                |                       |                   |      |      |                   |      |      |                   |      |      |                   |             |             |
| Caucasian      |                       | Proband (N=98)    |      |      | Sibling (N= 124)  |      |      | Parent (N= 636 )  |      |      | Control (N=499)   |             |             |
|                | Whole                 | 2.08              | 0.45 | 1.63 | 1.42              | 0.49 | 0.93 | 4.04              | 0.60 | 3.44 | <b>3.23</b>       | <b>0.53</b> | <b>2.70</b> |
|                | Maxilla               | 1.19              | 0.34 | 0.86 | 0.81              | 0.31 | 0.50 | 2.67              | 0.39 | 2.28 | 2.20              | 0.36        | 1.85        |
|                | Mandible              | 0.89              | 0.11 | 0.78 | 0.61              | 0.18 | 0.43 | 1.37              | 0.21 | 1.16 | 1.03              | 0.17        | 0.86        |
|                |                       |                   |      |      |                   |      |      |                   |      |      |                   |             |             |
| Latin American |                       | Proband (N=117)   |      |      | Sibling (N= 85)   |      |      | Parent (N= 449 )  |      |      | Control (N=369)   |             |             |
|                | Whole                 | 1.86              | 0.65 | 1.21 | 1.71              | 0.32 | 1.39 | 4.15              | 0.97 | 3.18 | 2.24              | 0.58        | 1.66        |
|                | Maxilla               | 1.26              | 0.43 | 0.83 | 1.04              | 0.29 | 0.74 | 3.07              | 0.77 | 2.30 | 1.82              | 0.51        | 1.31        |
|                | Mandible              | 0.60              | 0.21 | 0.39 | 0.67              | 0.02 | 0.65 | 1.09              | 0.21 | 0.88 | 0.42              | 0.07        | 0.35        |
|                |                       |                   |      |      |                   |      |      |                   |      |      |                   |             |             |
|                |                       |                   |      |      |                   |      |      |                   |      |      |                   |             |             |
|                |                       |                   |      |      |                   |      |      |                   |      |      |                   |             |             |

\*All numbers given as means

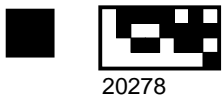

20278

# OFC Dental Phenotype Form Part 2 Dental Professionals

Recorded by  
    
 Dentist Initials

Letters Number  
 Study ID   -

Individual ID         -     Date   /   /

## 1. Dental Examination, Maxillary Teeth

Part 2 Not Completed/Refused

Rate each tooth by marking the bubbles below. Fill-in the bubble for primary or permanent tooth. Teeth can either be missing, sound, decayed, or restored. If there is a supernumerary tooth, mark the box between the two adjacent teeth.

| Quadrant 1                                                                                                   | 18                                                         | 1                     | 17                    | 2                     | 16                    | 3                     | 15 <input type="radio"/> 4<br>55 <input type="radio"/> A | 14 <input type="radio"/> 5<br>54 <input type="radio"/> B | 13 <input type="radio"/> 6<br>53 <input type="radio"/> C | 12 <input type="radio"/> 7<br>52 <input type="radio"/> D | 11 <input type="radio"/> 8<br>51 <input type="radio"/> E |
|--------------------------------------------------------------------------------------------------------------|------------------------------------------------------------|-----------------------|-----------------------|-----------------------|-----------------------|-----------------------|----------------------------------------------------------|----------------------------------------------------------|----------------------------------------------------------|----------------------------------------------------------|----------------------------------------------------------|
|                                                                                                              | <b>Missing:</b> Decay<br>Agenesis<br>Other<br>X-ray Needed | <input type="radio"/>                                    | <input type="radio"/>                                    | <input type="radio"/>                                    | <input type="radio"/>                                    | <input type="radio"/>                                    |
| <b>Sound</b><br><b>Decayed</b><br><b>Restored</b>                                                            | <input type="radio"/>                                      | <input type="radio"/> | <input type="radio"/> | <input type="radio"/> | <input type="radio"/> | <input type="radio"/> | <input type="radio"/>                                    | <input type="radio"/>                                    | <input type="radio"/>                                    | <input type="radio"/>                                    | <input type="radio"/>                                    |
| <b>Other:</b> Fluorosis<br>Hypoplasia<br>Microdontia<br>Impacted<br>Rotation<br>Displaced<br>Other (specify) | <input type="radio"/>                                      | <input type="radio"/> | <input type="radio"/> | <input type="radio"/> | <input type="radio"/> | <input type="radio"/> | <input type="radio"/>                                    | <input type="radio"/>                                    | <input type="radio"/>                                    | <input type="radio"/>                                    | <input type="radio"/>                                    |
| <b>Extra Teeth</b>                                                                                           | <input type="radio"/>                                      | <input type="radio"/> | <input type="radio"/> | <input type="radio"/> | <input type="radio"/> | <input type="radio"/> | <input type="radio"/>                                    | <input type="radio"/>                                    | <input type="radio"/>                                    | <input type="radio"/>                                    | <input type="radio"/>                                    |

Quadrant 1 Notes

| Quadrant 2                                                                                                   | 21 <input type="radio"/> 9<br>61 <input type="radio"/> F   | 22 <input type="radio"/> 10<br>62 <input type="radio"/> G | 23 <input type="radio"/> 11<br>63 <input type="radio"/> H | 24 <input type="radio"/> 12<br>64 <input type="radio"/> I | 25 <input type="radio"/> 13<br>65 <input type="radio"/> J | 26                    | 14                    | 27                    | 15                    | 28                    | 16                    |
|--------------------------------------------------------------------------------------------------------------|------------------------------------------------------------|-----------------------------------------------------------|-----------------------------------------------------------|-----------------------------------------------------------|-----------------------------------------------------------|-----------------------|-----------------------|-----------------------|-----------------------|-----------------------|-----------------------|
|                                                                                                              | <b>Missing:</b> Decay<br>Agenesis<br>Other<br>X-ray Needed | <input type="radio"/>                                     | <input type="radio"/>                                     | <input type="radio"/>                                     | <input type="radio"/>                                     | <input type="radio"/> | <input type="radio"/> | <input type="radio"/> | <input type="radio"/> | <input type="radio"/> | <input type="radio"/> |
| <b>Sound</b><br><b>Decayed</b><br><b>Restored</b>                                                            | <input type="radio"/>                                      | <input type="radio"/>                                     | <input type="radio"/>                                     | <input type="radio"/>                                     | <input type="radio"/>                                     | <input type="radio"/> | <input type="radio"/> | <input type="radio"/> | <input type="radio"/> | <input type="radio"/> | <input type="radio"/> |
| <b>Other:</b> Fluorosis<br>Hypoplasia<br>Microdontia<br>Impacted<br>Rotation<br>Displaced<br>Other (specify) | <input type="radio"/>                                      | <input type="radio"/>                                     | <input type="radio"/>                                     | <input type="radio"/>                                     | <input type="radio"/>                                     | <input type="radio"/> | <input type="radio"/> | <input type="radio"/> | <input type="radio"/> | <input type="radio"/> | <input type="radio"/> |
| <b>Extra Teeth</b>                                                                                           | <input type="radio"/>                                      | <input type="radio"/>                                     | <input type="radio"/>                                     | <input type="radio"/>                                     | <input type="radio"/>                                     | <input type="radio"/> | <input type="radio"/> | <input type="radio"/> | <input type="radio"/> | <input type="radio"/> | <input type="radio"/> |

Quadrant 2 Notes

# OFC Dental Phenotype Part 2 Intra-Oral Photos

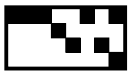

4106

Recorded by  
    
 Initials

Study ID  
 Letters:   Numbers:

Date: mm   / dd   / yyyy

Individual ID: Number         - Number

## Overall Photo Quality

- Poor
- Good

## 1. Dental Examination, Maxillary Teeth

Rate each tooth by marking the bubbles below. Each tooth should have an entry. Fill-in the bubble for primary or permanent tooth. Teeth can either be missing or present. If there is space or a supernumerary tooth, mark the box between the two adjacent teeth.

| Quadrant 1                                          | 18                    | 1                     | 17                    | 2                     | 16                    | 3                     | 15                    | 4                     | 14                    | 5                     | 13                    | 6                     | 12                    | 7                     | 11                    | 8                     |                       |
|-----------------------------------------------------|-----------------------|-----------------------|-----------------------|-----------------------|-----------------------|-----------------------|-----------------------|-----------------------|-----------------------|-----------------------|-----------------------|-----------------------|-----------------------|-----------------------|-----------------------|-----------------------|-----------------------|
|                                                     |                       |                       |                       |                       |                       |                       | 55                    | A                     | 54                    | B                     | 53                    | C                     | 52                    | D                     | 51                    | E                     |                       |
| <b>Missing:</b> Agenesis                            | <input type="radio"/> |
| Other                                               | <input type="radio"/> |
| <b>Present</b>                                      | <input type="radio"/> |
| <b>Present Status:</b>                              |                       |                       |                       |                       |                       |                       |                       |                       |                       |                       |                       |                       |                       |                       |                       |                       |                       |
| Full coverage (crown)                               | <input type="radio"/> |
| Partial coverage (onlay, cusp replacement, veneers) | <input type="radio"/> |
| Filling (amalgam, composite)                        | <input type="radio"/> |
| Gross decay                                         | <input type="radio"/> |
| Attrition more than 2/3 of the clinical crown       | <input type="radio"/> |
| <b>If present:</b>                                  |                       |                       |                       |                       |                       |                       |                       |                       |                       |                       |                       |                       |                       |                       |                       |                       |                       |
| Fluorosis                                           | <input type="radio"/> |
| Hypoplasia                                          | <input type="radio"/> |
| Hypocalcification                                   | <input type="radio"/> |
| Microdontia                                         | <input type="radio"/> |
| Impacted                                            | <input type="radio"/> |
| Rotation                                            | <input type="radio"/> |
| Displaced                                           | <input type="radio"/> |
| Mammalons                                           | <input type="radio"/> |
| Incisal Fissures                                    | <input type="radio"/> |
| Other (specify below)                               | <input type="radio"/> |
| <b>Confidence:</b> Low                              | <input type="radio"/> |
| High                                                | <input type="radio"/> |
| <b>Extra Teeth</b>                                  |                       | <input type="radio"/> |
| <b>Space Between Teeth</b>                          |                       | <input type="radio"/> |

Quadrant 1 Notes

Appendix Figure 3. Intra-oral photographs – Primary Dentition

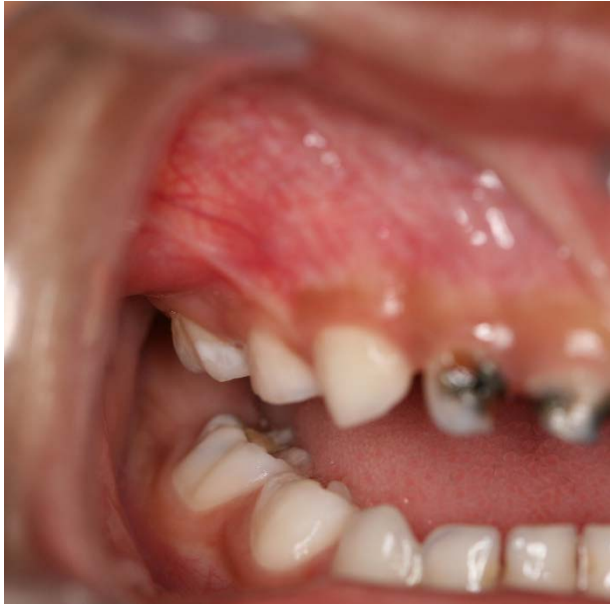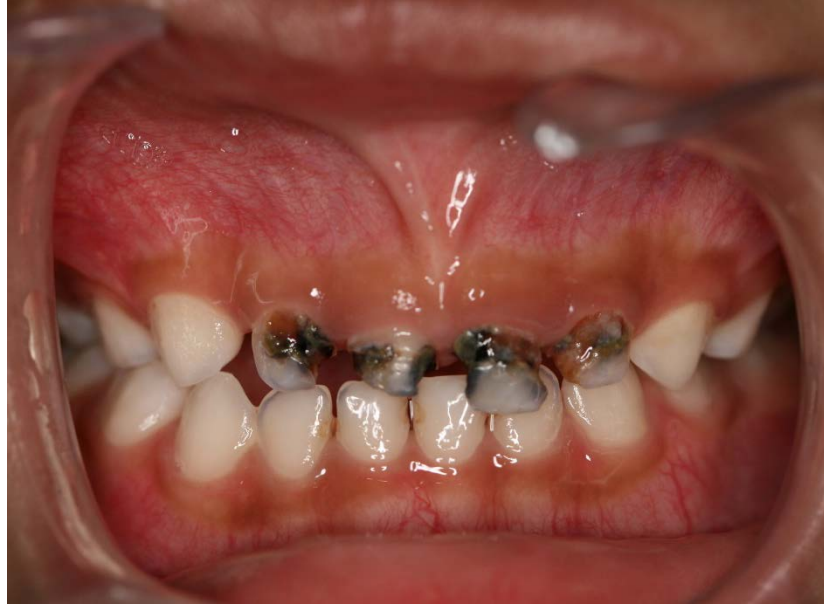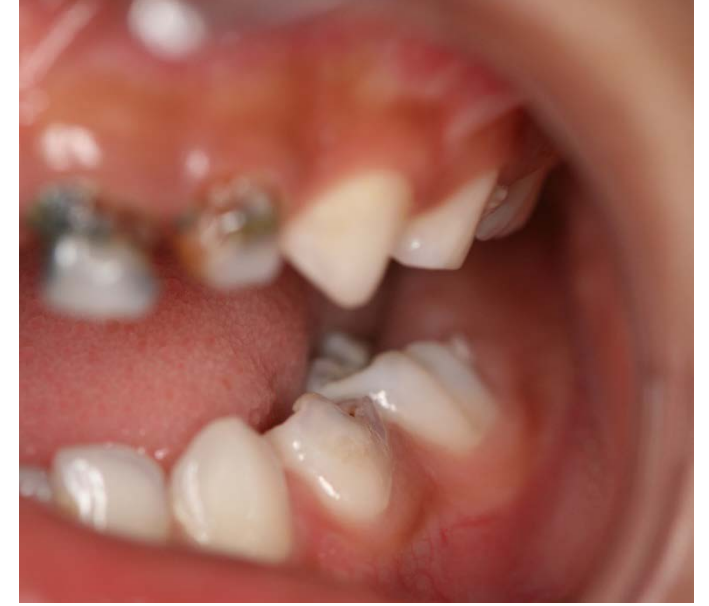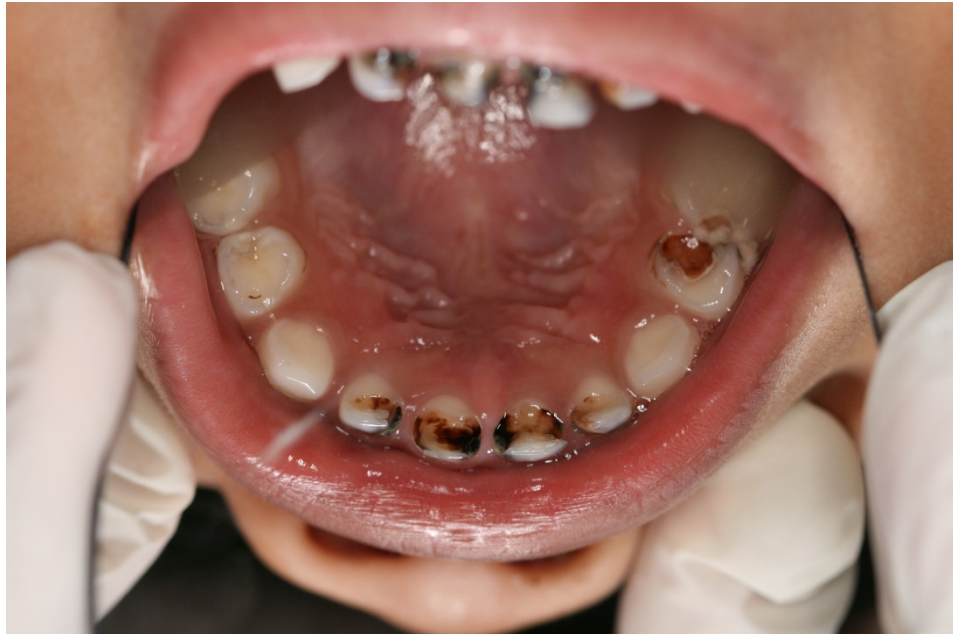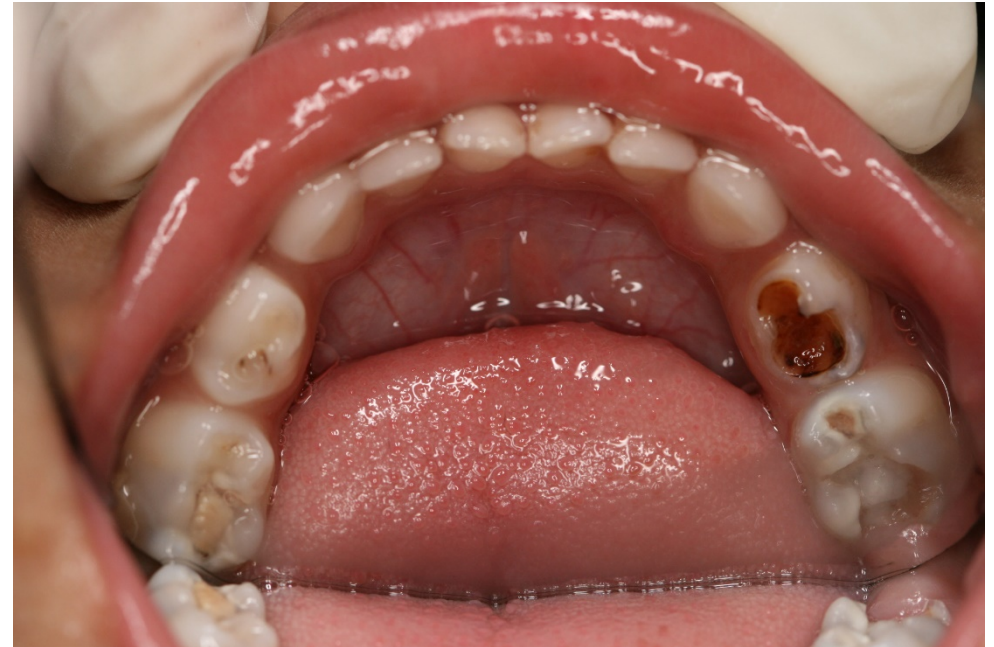









Appendix Figure 5. Intra-oral photograph- Permanent Dentition

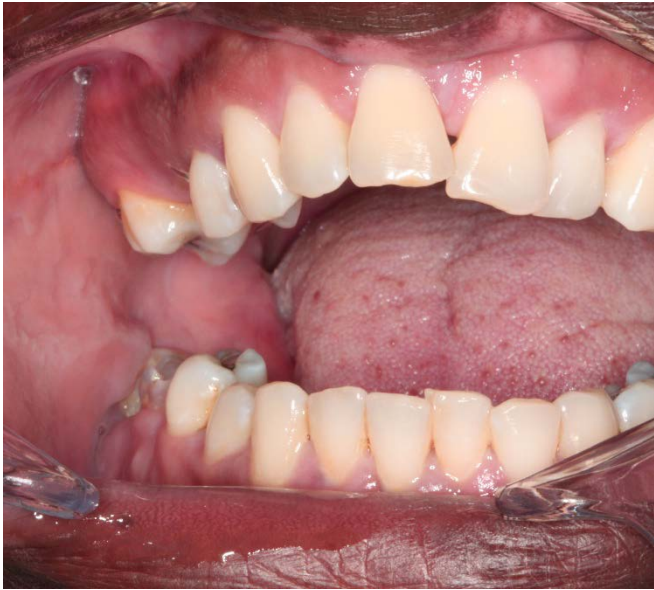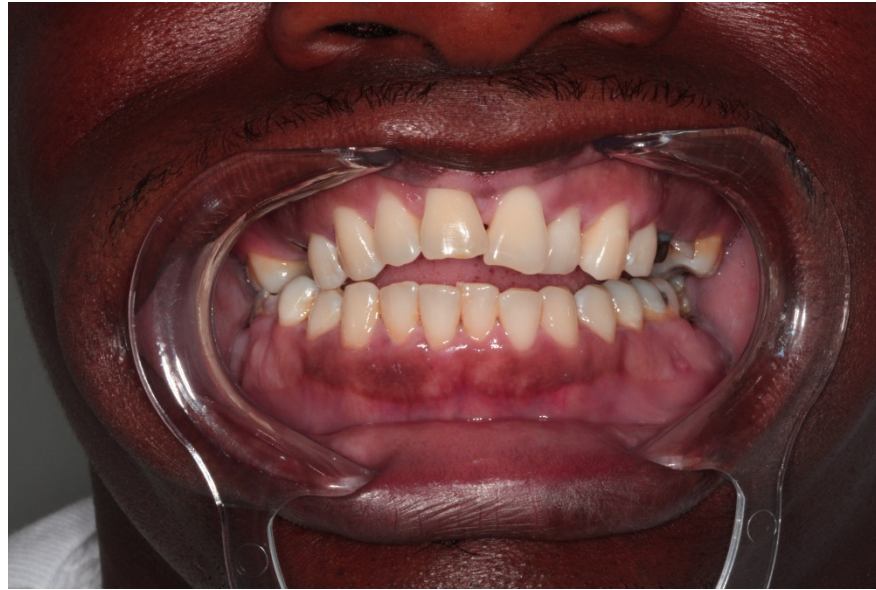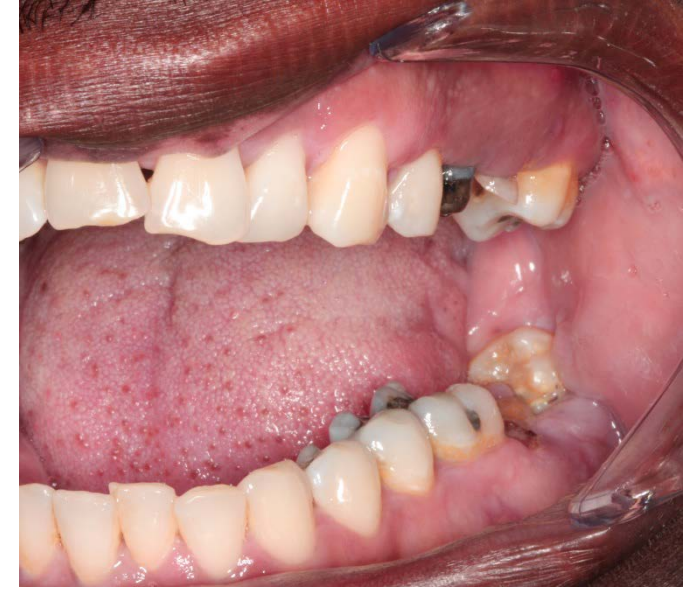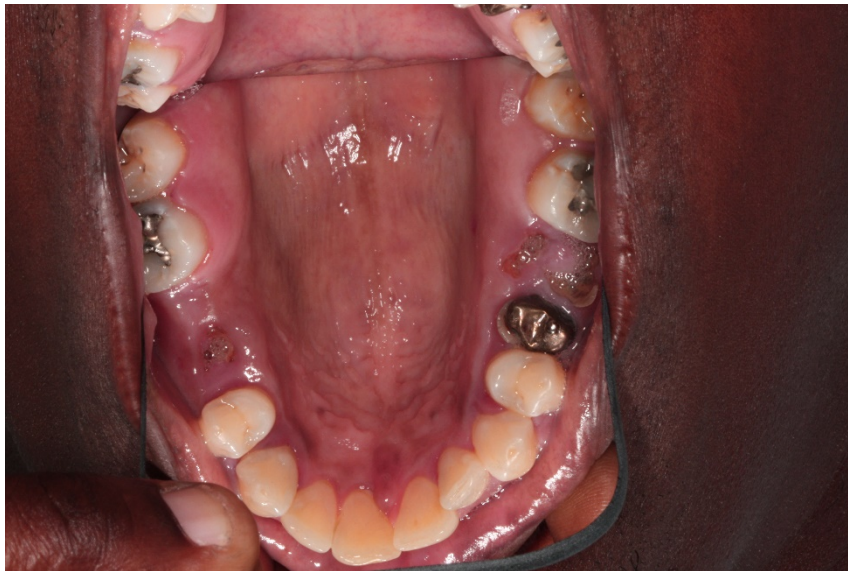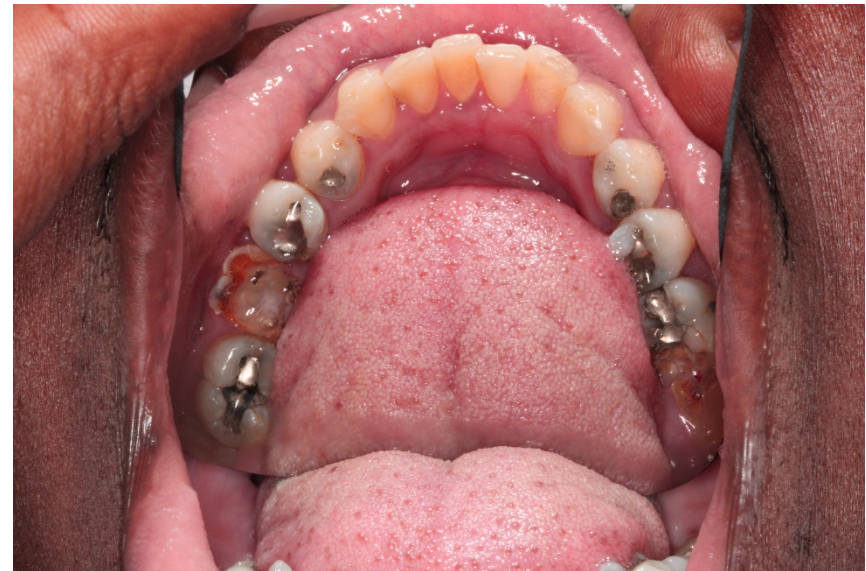

Supplement: DS_10.1177_0022034517709961.pdf [file DS_10.1177_0022034517709961.pdf]
